# Supplementary material for: Bond stretch isomerism in Be32−driven by the Renner–Teller effect
Source: Royal Society of Chemistry journal article supplement (doi:10.1039/c9cp00643e), 2019-01-01
Supplement: c9cp00643e1.pdf [file c9cp00643e1.pdf]

## Electronic Supplementary Information (ESI)

### Bond stretch isomerism in $\text{Be}_3^{2-}$ driven by Renner-Teller effect

Manoswita Homray<sup>1,2</sup>, Sukanta Mondal<sup>2,3</sup>, Anirban Misra<sup>1\*</sup> and P. K. Chattaraj<sup>2,4\*</sup>

<sup>1</sup>*Department of Chemistry, University of North Bengal, Raja Rammohunpur, Darjeeling, 734013, West Bengal, India, e-mail: [anirbanmisra@yahoo.com](mailto:anirbanmisra@yahoo.com), e-mail: [manosweet.homray96@gmail.com](mailto:manosweet.homray96@gmail.com) Telephone: +91-9434228745*

<sup>2</sup>*Department of Chemistry and Center for Theoretical Studies, Indian Institute of Technology Kharagpur, Kharagpur 721302, West Bengal, India. e-mail: [pkc@chem.iitkgp.ac.in](mailto:pkc@chem.iitkgp.ac.in), Telephone: +91-3222-283304, Fax: +91-3222-255303*

<sup>3</sup>*Department of Educational Science, Assam University, Silchar, Assam-788011, India, e-mail: [sukanta.mondal@aus.ac.in](mailto:sukanta.mondal@aus.ac.in), [sukanta.mail13@gmail.com](mailto:sukanta.mail13@gmail.com), Telephone: +91-7797951118*

<sup>4</sup>*Department of Chemistry, Indian Institute of Technology Bombay, Powai-400076, Mumbai, India*

**Vid.S1.** Graphics interchange format video of the isomerization process.

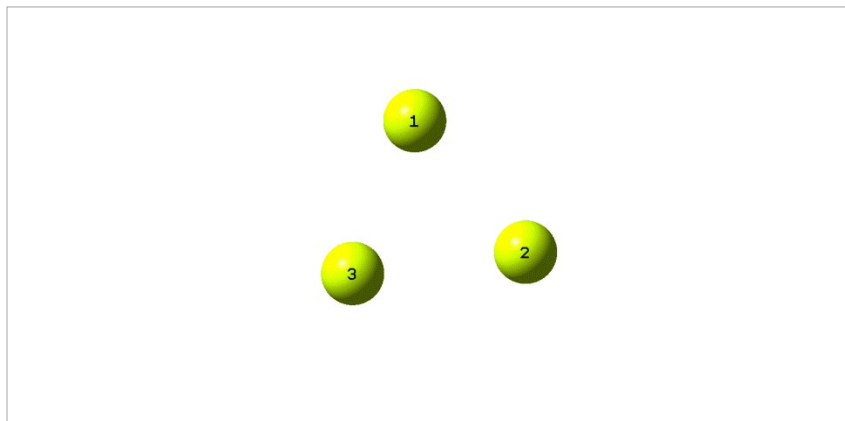

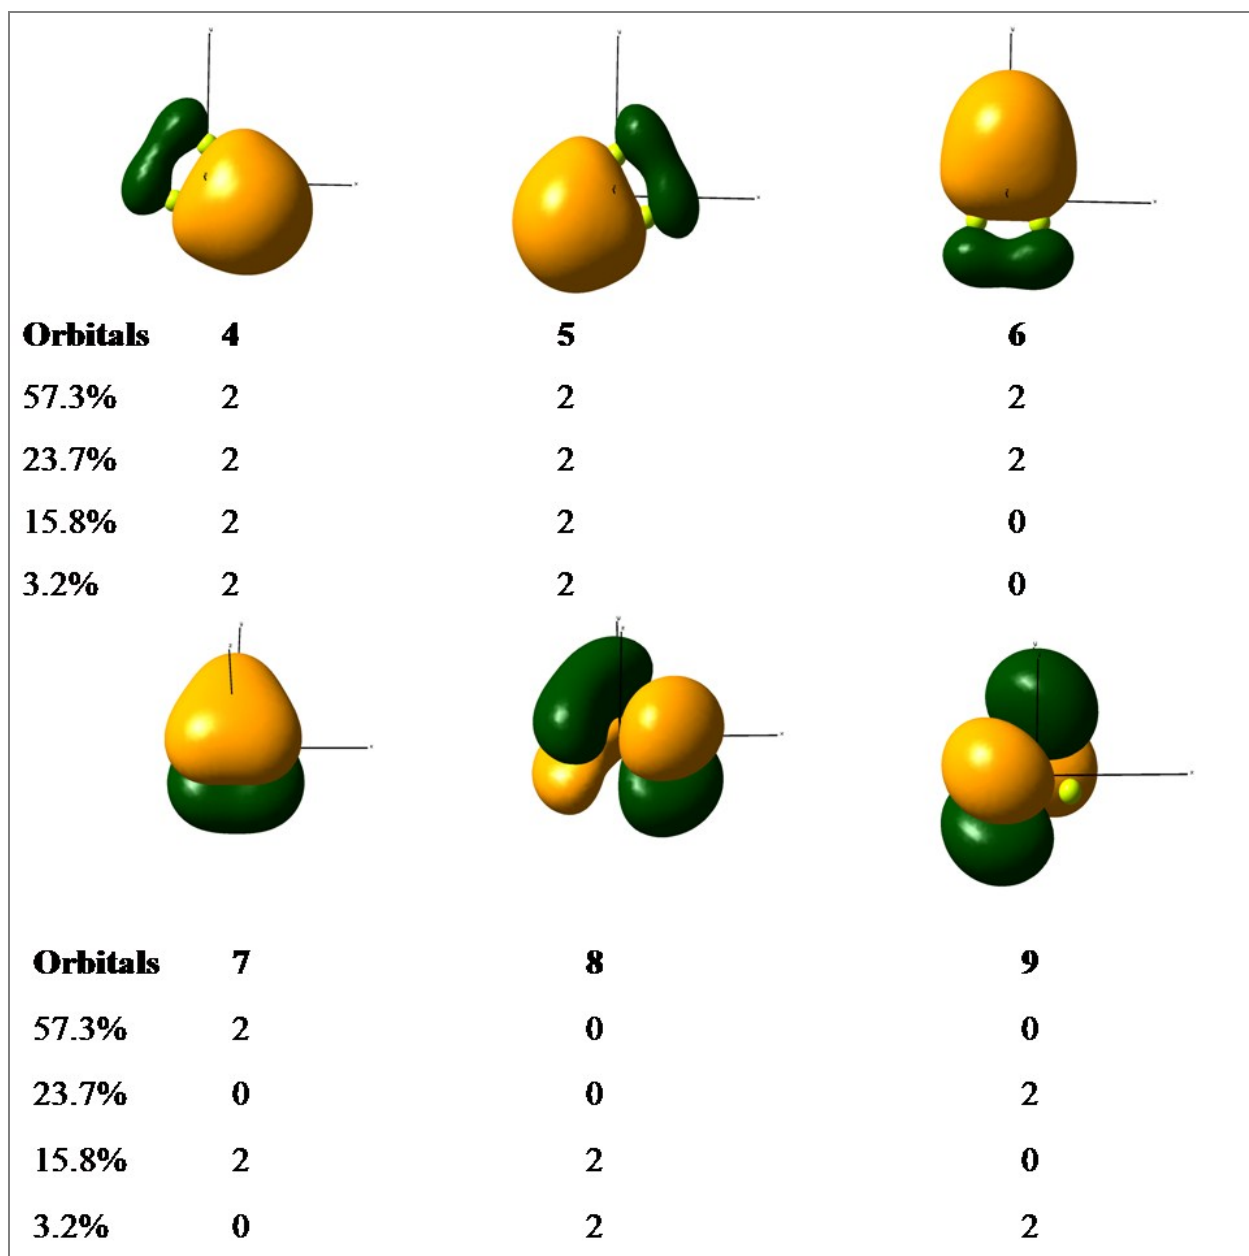

**Fig. S1** The orbital set used to construct the active space in CASSCF (8,6) method along with the percentages of leading configurations in wavefunctions.

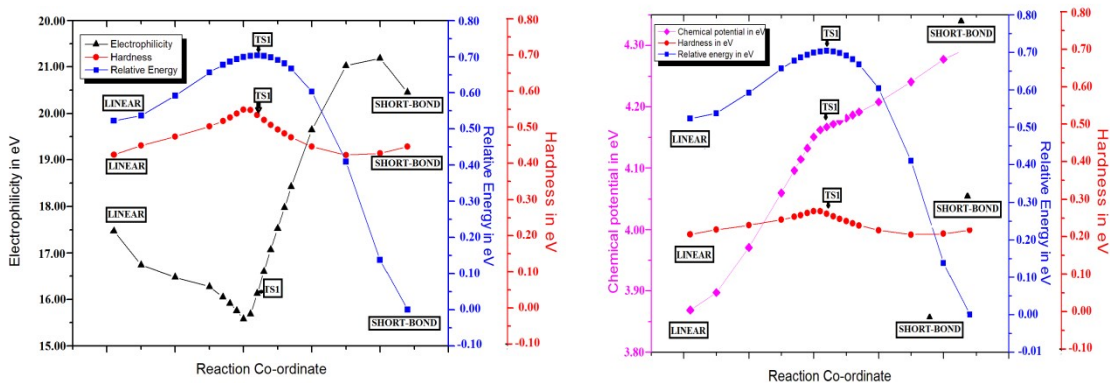

**Fig. S2** Variation of hardness, electrophilicity, relative energy and chemical potential along the isomerization path from linear to short-bond via TS1.

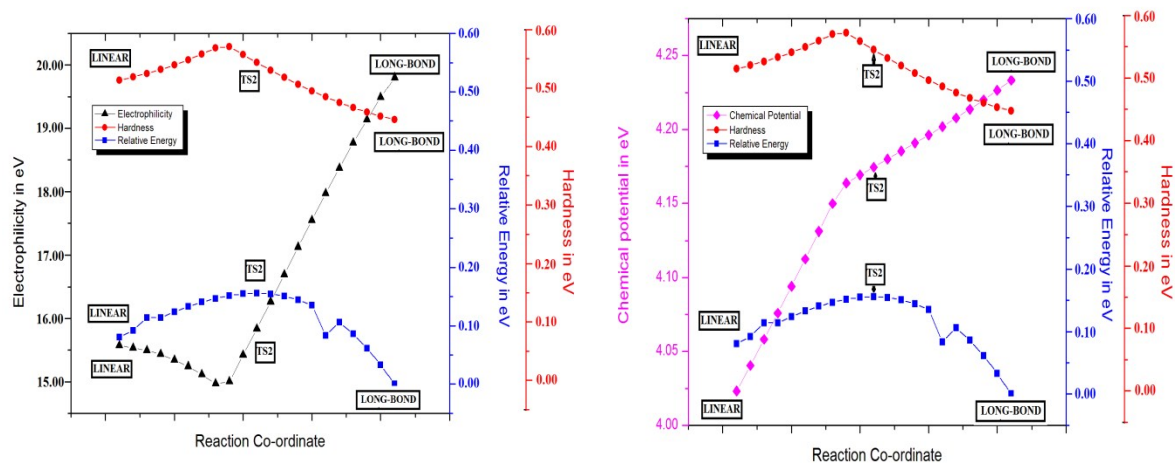

**Fig. S3** Variation of hardness, electrophilicity, relative energy and chemical potential along the isomerization path from linear to long-bond via TS2.
